# Supplementary material for: Impact of 16S rRNA gene redundancy and primer pair selection on the quantification and classification of oral microbiota in next-generation sequencing
Source: Research Square preprint supplement (doi:10.21203/rs.3.rs-662236/v1), 2021-07-01
Supplement: Supplementary file 1 [file 7b4d54259801bee0f9579d4f.xlsx]

## Sheet: Title.Abreviatures
Additional table 29. Overestimation factor of bacterial species using the bacterial-specific primer pairs
The overestimation of abundance at the species level (the overestimation factor – OF-) represented for each species the combination of the number of copies of the 16S rRNA gene amplicons and the number of matching amplicons. The calculation of this parameter is relative to the set of species used so comparisons between primer pairs with different species sets cannot be made
The species included in the table were those that presented at least one matching amplicon in any of the primer pairs tested
ALC	Amplicon length category
bps	Base pairs
KP_F	Klindworth primer forward
KP_R	Klindworth primer reverse
L	Large amplicon length range, >600 base pairs
M	Medium amplicon length range, 301-600 base pairs
Max	Maximum
Min	Minimum
Num_genes	Number of genes
OF	Overestimation factor
OP_F	Oral primer forward
OP_R	Oral primer reverse
S	Short amplicon length range, 100-300 base pairs

## Sheet: Additional_table_29
								Primer pairs previously selected due to their coverage															Most used primer pairs
						ALC		S						M						L			M			L
						Min mean OF	4.5
						Max mean OF	13.16
						Mean OF	4.4	5.82	8.28	13.16	6.01	7.48	7.44	4.8	5.04	4.72	7.45	5.53	6.13	4.72	4.72	4.89	4.5	5.04	5.62	4.5
						Cumulative OF	440	582	828	1316	601	748	744	480	504	472	745	553	613	472	472	489	450	504	562	450
Superkingdom	Phyla	Class	Order	Family	Genera	Species	Num_genes	KP_F048_OP_R043	OP_F098_OP_R119	OP_F066_KP_R040	OP_F009_OP_R030	KP_F061_KP_R074	OP_F101_OP_R030	OP_R053_KP_R020	KP_F048_KP_R031	KP_F048_OP_R073	KP_F051_KP_R041	KP_F051_OP_R030	OP_F116_KP_R060	KP_F048_OP_R030	KP_F048_KP_R060	KP_F056_KP_R077	KP_F031_KP_R021	KP_F047_KP_R035	OP_F009_OP_R029	KP_F034_KP_R065
Bacteria	Proteobacteria	Betaproteobacteria	Burkholderiales	Alcaligenaceae	Achromobacter	xylosoxidans	3	3	3	6	3	3	3	3	3	3	3	3	3	3	3	3	3	3	3	3
Bacteria	Proteobacteria	Betaproteobacteria	Burkholderiales	Comamonadaceae	Acidovorax	ebreus	3	3	3	5	3	3	3	3	3	3	3	3	3	3	3	3	3	3	3	3
Bacteria	Proteobacteria	Gammaproteobacteria	Pseudomonadales	Moraxellaceae	Acinetobacter	baumannii	6	6	6	19	12	12	12	6	6	6	6	6	12	6	6	6	6	6	12	6
Bacteria	Proteobacteria	Gammaproteobacteria	Pseudomonadales	Moraxellaceae	Acinetobacter	johnsonii	7	7	7	19	7	7	7	7	7	7	7	7	7	7	7	7	7	7	7	7
Bacteria	Proteobacteria	Gammaproteobacteria	Pseudomonadales	Moraxellaceae	Acinetobacter	junii	6	6	6	19	12	12	12	6	6	6	6	6	12	6	6	6	6	6	12	6
Bacteria	Actinobacteria	Actinomycetia	Actinomycetales	Actinomycetaceae	Actinomyces	oris	3	3	9	9	6	6	6	3	3	3	9	6	9	3	3	6	3	3	6	3
Bacteria	Actinobacteria	Actinomycetia	Actinomycetales	Actinomycetaceae	Actinomyces	sp. oral taxon 169	3	3	9	9	3	3	3	3	3	3	9	3	9	3	3	3	3	3	3	3
Bacteria	Actinobacteria	Actinomycetia	Actinomycetales	Actinomycetaceae	Actinomyces	sp. oral taxon 171	3	3	9	9	6	6	6	3	3	3	9	6	9	3	3	6	3	3	6	3
Bacteria	Proteobacteria	Alphaproteobacteria	Hyphomicrobiales	Rhizobiaceae	Agrobacterium	fabrum	4	4	4	7	4	4	4	4	4	4	4	4	4	4	4	4	4	4	4	4
Bacteria	Proteobacteria	Alphaproteobacteria	Hyphomicrobiales	Rhizobiaceae	Agrobacterium	radiobacter	3	3	3	7	3	3	3	3	3	3	3	3	3	3	3	3	3	3	3	3
Bacteria	Firmicutes	Bacilli	Bacillales	Bacillaceae	Bacillus	subtilis	9	9	9	14	9	9	9	9	9	9	9	9	9	9	9	9	9	9	9	9
Bacteria	Actinobacteria	Actinomycetia	Bifidobacteriales	Bifidobacteriaceae	Bifidobacterium	breve	3	3	7	3	7	3	3	3	3	3	3	7	3	3	3	3	3	3	7	3
Bacteria	Actinobacteria	Actinomycetia	Bifidobacteriales	Bifidobacteriaceae	Bifidobacterium	dentium	4	4	4	4	4	4	4	4	4	4	4	4	4	4	4	4	4	4	4	4
Bacteria	Actinobacteria	Actinomycetia	Bifidobacteriales	Bifidobacteriaceae	Bifidobacterium	longum	4	4	7	4	7	4	4	4	4	4	4	7	4	4	4	4	4	4	7	4
Bacteria	Proteobacteria	Betaproteobacteria	Burkholderiales	Alcaligenaceae	Bordetella	pertussis	3	3	3	6	3	3	3	3	3	3	3	3	3	3	3	3	3	3	3	3
Bacteria	Proteobacteria	Betaproteobacteria	Burkholderiales	Burkholderiaceae	Burkholderia	cepacia	2	2	2	6	2	2	2	2	2	2	2	2	2	2	2	2	2	2	2	2
Bacteria	Proteobacteria	Epsilonproteobacteria	Campylobacterales	Campylobacteraceae	Campylobacter	concisus	3	3	3	3	6	6	3	3	3	3	3	3	3	3	3	3	3	3	3	3
Bacteria	Proteobacteria	Epsilonproteobacteria	Campylobacterales	Campylobacteraceae	Campylobacter	curvus	3	3	3	3	6	6	3	3	3	3	3	3	3	3	3	3	3	3	3	3
Bacteria	Bacteroidetes	Flavobacteriia	Flavobacteriales	Flavobacteriaceae	Capnocytophaga	ochracea	4	4	4	8	4	4	4	4	4	4	4	4	4	4	4	4	4	4	4	4
Bacteria	Bacteroidetes	Flavobacteriia	Flavobacteriales	Flavobacteriaceae	Capnocytophaga	sp. oral taxon 323	4	4	4	8	4	4	4	4	4	4	4	4	4	4	4	4	4	4	4	4
Bacteria	Actinobacteria	Actinomycetia	Corynebacteriales	Corynebacteriaceae	Corynebacterium	kroppenstedtii	3	3	3	8	3	3	3	3	3	3	3	3	3	3	3	3	3	3	3	3
Bacteria	Actinobacteria	Actinomycetia	Corynebacteriales	Corynebacteriaceae	Corynebacterium	simulans	4	4	8	12	4	4	4	4	4	4	8	4	4	4	4	4	4	4	4	4
Bacteria	Actinobacteria	Actinomycetia	Corynebacteriales	Corynebacteriaceae	Corynebacterium	singulare	4	4	4	12	4	4	4	4	4	4	4	4	4	4	4	4	4	4	4	4
Bacteria	Actinobacteria	Actinomycetia	Corynebacteriales	Corynebacteriaceae	Corynebacterium	sp. ATCC 6931	5	5	5	8	5	5	5	5	5	5	5	5	5	5	5	5	5	5	5	5
Bacteria	Actinobacteria	Actinomycetia	Corynebacteriales	Corynebacteriaceae	Corynebacterium	striatum	4	4	8	12	4	4	4	4	4	4	8	4	4	4	4	4	4	4	4	4
Bacteria	Proteobacteria	Gammaproteobacteria	Enterobacterales	Enterobacteriaceae	Cronobacter	malonaticus	7	14	14	29	14	14	14	14	14	14	14	14	14	14	14	14	7	14	14	7
Bacteria	Proteobacteria	Gammaproteobacteria	Enterobacterales	Enterobacteriaceae	Cronobacter	sakazakii	7	14	14	29	14	14	14	14	14	14	14	14	14	14	14	14	7	14	14	7
Bacteria	Actinobacteria	Actinomycetia	Propionibacteriales	Propionibacteriaceae	Cutibacterium	acnes	3	3	3	6	3	3	3	3	3	3	3	3	3	3	3	3	3	3	3	3
Bacteria	Proteobacteria	Gammaproteobacteria	Enterobacterales	Enterobacteriaceae	Escherichia	coli	7	7	7	29	7	23	23	7	7	7	7	7	7	7	7	7	7	7	7	7
Bacteria	Fusobacteria	Fusobacteriia	Fusobacteriales	Fusobacteriaceae	Fusobacterium	hwasookii	5	9	5	9	9	9	9	5	5	5	5	5	9	5	5	5	5	5	9	5
Bacteria	Fusobacteria	Fusobacteriia	Fusobacteriales	Fusobacteriaceae	Fusobacterium	nucleatum	4	9	4	9	9	9	9	4	4	4	4	4	9	4	4	4	4	4	9	4
Bacteria	Proteobacteria	Gammaproteobacteria	Pasteurellales	Pasteurellaceae	Haemophilus	influenzae	6	6	12	6	6	6	6	6	6	6	6	6	6	6	6	6	6	6	6	6
Bacteria	Proteobacteria	Gammaproteobacteria	Pasteurellales	Pasteurellaceae	Haemophilus	parainfluenzae	6	6	6	6	6	13	13	6	6	6	6	6	6	6	6	6	6	6	6	6
Bacteria	Proteobacteria	Gammaproteobacteria	Pasteurellales	Pasteurellaceae	Haemophilus	sp. oral taxon 036	6	6	12	6	6	6	6	6	6	6	6	6	6	6	6	6	6	6	6	6
Bacteria	Proteobacteria	Gammaproteobacteria	Enterobacterales	Enterobacteriaceae	Klebsiella	aerogenes	8	8	24	29	8	15	15	8	8	8	8	8	8	8	8	8	8	8	8	8
Bacteria	Proteobacteria	Gammaproteobacteria	Enterobacterales	Enterobacteriaceae	Klebsiella	pneumoniae	8	16	24	8	8	23	23	16	16	8	8	8	16	8	8	8	8	16	8	8
Bacteria	Proteobacteria	Gammaproteobacteria	Enterobacterales	Enterobacteriaceae	Klebsiella	variicola	8	16	24	15	8	23	23	16	16	8	8	8	16	8	8	8	8	16	8	8
Bacteria	Actinobacteria	Actinomycetia	Micrococcales	Micrococcaceae	Kocuria	palustris	3	3	3	3	3	3	3	3	3	3	3	3	3	3	3	3	3	3	3	3
Bacteria	Firmicutes	Bacilli	Lactobacillales	Lactobacillaceae	Lacticaseibacillus	paracasei	5	10	5	10	10	10	10	5	5	5	5	5	10	5	5	5	5	5	10	5
Bacteria	Firmicutes	Bacilli	Lactobacillales	Lactobacillaceae	Lacticaseibacillus	rhamnosus	5	10	5	10	10	10	10	5	5	5	5	5	10	5	5	5	5	5	10	5
Bacteria	Firmicutes	Bacilli	Lactobacillales	Lactobacillaceae	Lactobacillus	acidophilus	4	4	4	19	4	4	4	4	4	4	4	4	4	4	4	4	4	4	4	4
Bacteria	Firmicutes	Bacilli	Lactobacillales	Lactobacillaceae	Lactobacillus	amylovorus	4	4	4	19	4	4	4	4	4	4	4	4	4	4	4	4	4	4	4	4
Bacteria	Firmicutes	Bacilli	Lactobacillales	Lactobacillaceae	Lactobacillus	gasseri	6	6	11	19	11	11	11	6	6	6	11	11	6	6	6	6	6	6	11	6
Bacteria	Firmicutes	Bacilli	Lactobacillales	Lactobacillaceae	Lactobacillus	johnsonii	5	5	11	19	11	11	11	5	5	5	11	11	5	5	5	5	5	5	11	5
Bacteria	Firmicutes	Bacilli	Lactobacillales	Lactobacillaceae	Lentilactobacillus	buchneri	5	5	5	10	5	5	5	5	5	5	5	5	5	5	5	5	5	5	5	5
Bacteria	Fusobacteria	Fusobacteriia	Fusobacteriales	Leptotrichiaceae	Leptotrichia	buccalis	5	5	5	10	5	5	5	5	5	5	5	5	5	5	5	5	5	5	5	5
Bacteria	Fusobacteria	Fusobacteriia	Fusobacteriales	Leptotrichiaceae	Leptotrichia	sp. oral taxon 498	5	5	5	10	5	5	5	5	5	5	5	5	5	5	5	5	5	5	5	5
Bacteria	Firmicutes	Bacilli	Lactobacillales	Lactobacillaceae	Levilactobacillus	brevis	5	5	5	10	5	5	5	5	5	5	5	5	5	5	5	5	5	5	5	5
Bacteria	Firmicutes	Bacilli	Lactobacillales	Lactobacillaceae	Limosilactobacillus	fermentum	5	5	5	11	5	5	5	5	5	5	5	5	5	5	5	5	5	5	5	5
Bacteria	Firmicutes	Bacilli	Lactobacillales	Lactobacillaceae	Limosilactobacillus	reuteri	6	6	6	11	6	6	6	6	6	6	6	6	6	6	6	6	6	6	6	6
Bacteria	Firmicutes	Bacilli	Bacillales	Listeriaceae	Listeria	monocytogenes	6	6	6	51	6	6	6	6	6	6	6	6	6	6	6	6	6	6	6	6
Bacteria	Actinobacteria	Actinomycetia	Corynebacteriales	Mycobacteriaceae	Mycobacterium	leprae	1	1	1	4	1	1	1	1	1	1	1	1	1	1	1	1	1	1	1	1
Bacteria	Actinobacteria	Actinomycetia	Corynebacteriales	Mycobacteriaceae	Mycobacterium	tuberculosis	1	1	1	4	1	1	1	1	1	1	1	1	1	1	1	1	1	1	1	1
Bacteria	Actinobacteria	Actinomycetia	Corynebacteriales	Mycobacteriaceae	Mycolicibacterium	neoaurum	2	2	2	4	2	2	2	2	2	2	2	2	2	2	2	2	2	2	2	2
Bacteria	Tenericutes	Mollicutes	Mycoplasmatales	Mycoplasmataceae	Mycoplasma	genitalium	1	1	1	1	1	1	2	1	1	1	1	1	1	1	1	1	1	1	1	1
Bacteria	Tenericutes	Mollicutes	Mycoplasmatales	Mycoplasmataceae	Mycoplasma	pneumoniae	1	1	1	1	1	1	2	1	1	1	1	1	1	1	1	1	1	1	1	1
Bacteria	Proteobacteria	Betaproteobacteria	Neisseriales	Neisseriaceae	Neisseria	gonorrhoeae	4	4	4	8	4	4	4	4	4	4	4	4	4	4	4	4	4	4	4	4
Bacteria	Proteobacteria	Betaproteobacteria	Neisseriales	Neisseriaceae	Neisseria	meningitidis	4	4	4	8	4	4	4	4	4	4	4	4	4	4	4	4	4	4	4	4
Bacteria	Actinobacteria	Actinomycetia	Propionibacteriales	Propionibacteriaceae	Propionibacterium	sp. oral taxon 193	3	3	3	6	3	3	3	3	3	3	3	3	3	3	3	3	3	3	3	3
Bacteria	Proteobacteria	Gammaproteobacteria	Pseudomonadales	Pseudomonadaceae	Pseudomonas	aeruginosa	4	8	4	4	4	4	4	4	4	4	4	4	4	4	4	4	4	4	4	4
Bacteria	Proteobacteria	Gammaproteobacteria	Pseudomonadales	Pseudomonadaceae	Pseudomonas	fluorescens	6	11	6	11	11	11	11	6	6	6	6	6	11	6	6	6	6	6	6	6
Bacteria	Proteobacteria	Gammaproteobacteria	Pseudomonadales	Pseudomonadaceae	Pseudomonas	protegens	5	11	5	11	11	11	11	5	5	5	5	5	11	5	5	5	5	5	5	5
Bacteria	Proteobacteria	Gammaproteobacteria	Pseudomonadales	Pseudomonadaceae	Pseudomonas	stutzeri	4	8	4	4	4	4	4	4	4	4	4	4	4	4	4	4	4	4	4	4
Bacteria	Proteobacteria	Betaproteobacteria	Burkholderiales	Burkholderiaceae	Ralstonia	pickettii	4	4	4	6	4	4	4	4	4	4	4	4	4	4	4	4	4	4	4	4
Bacteria	Actinobacteria	Actinomycetia	Micrococcales	Micrococcaceae	Rothia	dentocariosa	3	3	3	3	3	3	3	3	3	3	3	3	3	3	3	3	3	3	3	3
Bacteria	Actinobacteria	Actinomycetia	Micrococcales	Micrococcaceae	Rothia	mucilaginosa	3	3	3	3	3	3	3	3	3	3	3	3	3	3	3	3	3	3	3	3
Bacteria	Actinobacteria	Actinomycetia	Actinomycetales	Actinomycetaceae	Schaalia	meyeri	3	3	3	6	3	3	3	3	3	3	3	3	3	3	3	3	3	3	3	3
Bacteria	Actinobacteria	Actinomycetia	Actinomycetales	Actinomycetaceae	Schaalia	odontolytica	3	3	3	6	3	3	3	3	3	3	3	3	3	3	3	3	3	3	3	3
Bacteria	Firmicutes	Negativicutes	Selenomonadales	Selenomonadaceae	Selenomonas	sp. oral taxon 478	4	4	4	8	4	4	4	4	4	4	4	4	4	4	4	4	4	4	4	4
Bacteria	Firmicutes	Negativicutes	Selenomonadales	Selenomonadaceae	Selenomonas	sp. oral taxon 920	4	4	4	8	4	4	4	4	4	4	4	4	4	4	4	4	4	4	4	4
Bacteria	Proteobacteria	Gammaproteobacteria	Enterobacterales	Yersiniaceae	Serratia	marcescens	7	7	7	15	7	15	15	7	7	7	7	7	7	7	7	7	7	7	7	7
Bacteria	Firmicutes	Bacilli	Bacillales	Staphylococcaceae	Staphylococcus	aureus	5	5	39	51	11	11	11	5	5	5	39	11	11	5	5	11	5	5	11	5
Bacteria	Firmicutes	Bacilli	Bacillales	Staphylococcaceae	Staphylococcus	capitis	6	6	39	51	12	12	12	6	6	6	39	12	11	6	6	6	6	6	12	6
Bacteria	Firmicutes	Bacilli	Bacillales	Staphylococcaceae	Staphylococcus	epidermidis	6	6	39	51	12	12	12	6	6	6	39	12	6	6	6	6	6	6	12	6
Bacteria	Firmicutes	Bacilli	Bacillales	Staphylococcaceae	Staphylococcus	haemolyticus	6	6	39	51	11	11	11	6	6	6	39	11	11	6	6	11	6	6	11	6
Bacteria	Firmicutes	Bacilli	Bacillales	Staphylococcaceae	Staphylococcus	lugdunensis	6	6	39	51	16	16	16	6	6	6	39	16	6	6	6	6	6	6	6	6
Bacteria	Firmicutes	Bacilli	Bacillales	Staphylococcaceae	Staphylococcus	pasteuri	5	10	39	51	16	16	16	10	10	10	39	16	10	10	10	10	10	10	10	10
Bacteria	Firmicutes	Bacilli	Bacillales	Staphylococcaceae	Staphylococcus	pettenkoferi	6	6	6	51	6	6	6	6	6	6	6	6	6	6	6	6	6	6	6	6
Bacteria	Firmicutes	Bacilli	Bacillales	Staphylococcaceae	Staphylococcus	schleiferi	5	5	5	14	5	5	5	5	5	5	5	5	5	5	5	5	5	5	5	5
Bacteria	Firmicutes	Bacilli	Bacillales	Staphylococcaceae	Staphylococcus	warneri	5	10	39	51	16	16	16	10	10	10	39	16	10	10	10	10	10	10	10	10
Bacteria	Firmicutes	Bacilli	Lactobacillales	Streptococcaceae	Streptococcus	agalactiae	7	7	7	15	7	7	7	7	7	7	7	7	13	7	7	7	7	7	7	7
Bacteria	Firmicutes	Bacilli	Lactobacillales	Streptococcaceae	Streptococcus	anginosus	4	8	4	12	4	4	4	4	4	4	4	4	4	4	4	4	4	4	4	4
Bacteria	Firmicutes	Bacilli	Lactobacillales	Streptococcaceae	Streptococcus	constellatus	4	4	4	12	4	4	4	4	4	4	4	4	8	4	4	4	4	4	4	4
Bacteria	Firmicutes	Bacilli	Lactobacillales	Streptococcaceae	Streptococcus	cristatus	4	8	4	4	4	4	4	4	4	4	4	4	8	4	4	4	4	4	4	4
Bacteria	Firmicutes	Bacilli	Lactobacillales	Streptococcaceae	Streptococcus	gordonii	4	4	4	15	4	10	10	4	4	4	4	4	8	4	4	4	4	4	4	4
Bacteria	Firmicutes	Bacilli	Lactobacillales	Streptococcaceae	Streptococcus	intermedius	4	8	4	12	4	4	4	4	4	4	4	4	8	4	4	4	4	4	4	4
Bacteria	Firmicutes	Bacilli	Lactobacillales	Streptococcaceae	Streptococcus	mitis	4	16	12	8	8	20	20	4	12	8	8	8	12	8	8	8	4	12	8	4
Bacteria	Firmicutes	Bacilli	Lactobacillales	Streptococcaceae	Streptococcus	oralis	4	16	12	8	8	20	20	4	12	8	8	8	12	8	8	8	4	12	8	4
Bacteria	Firmicutes	Bacilli	Lactobacillales	Streptococcaceae	Streptococcus	parasanguinis	4	8	4	4	4	8	8	4	4	4	4	4	4	4	4	4	4	4	4	4
Bacteria	Firmicutes	Bacilli	Lactobacillales	Streptococcaceae	Streptococcus	pneumoniae	4	16	4	4	4	20	20	4	4	4	4	4	12	4	4	4	4	4	4	4
Bacteria	Firmicutes	Bacilli	Lactobacillales	Streptococcaceae	Streptococcus	pyogenes	6	6	6	6	6	10	10	6	6	6	6	6	13	6	6	6	6	6	6	6
Bacteria	Firmicutes	Bacilli	Lactobacillales	Streptococcaceae	Streptococcus	salivarius	6	6	12	12	12	12	12	6	6	6	12	12	6	6	6	6	6	6	12	6
Bacteria	Firmicutes	Bacilli	Lactobacillales	Streptococcaceae	Streptococcus	sanguinis	4	4	4	15	4	20	20	4	4	4	4	4	4	4	4	4	4	4	4	4
Bacteria	Firmicutes	Bacilli	Lactobacillales	Streptococcaceae	Streptococcus	sp. oral taxon 431	4	16	12	4	4	20	20	4	12	4	4	4	4	4	4	4	4	12	4	4
Bacteria	Firmicutes	Bacilli	Lactobacillales	Streptococcaceae	Streptococcus	thermophilus	6	6	12	12	12	12	12	6	6	6	12	12	6	6	6	6	6	6	12	6
Bacteria	Bacteroidetes	Bacteroidia	Bacteroidales	Tannerellaceae	Tannerella	forsythia	2	2	2	4	2	2	2	2	2	2	2	2	2	2	2	2	2	2	2	2
Bacteria	Bacteroidetes	Bacteroidia	Bacteroidales	Tannerellaceae	Tannerella	sp. oral taxon HOT-286	2	2	2	4	2	2	2	2	2	2	2	2	2	2	2	2	2	2	2	2
Bacteria	Spirochaetes	Spirochaetia	Spirochaetales	Spirochaetaceae	Treponema	denticola	2	2	2	2	2	2	2	2	2	2	2	2	4	2	2	2	2	2	2	2
Bacteria	Spirochaetes	Spirochaetia	Spirochaetales	Spirochaetaceae	Treponema	putidum	2	2	2	2	2	2	2	2	2	2	2	2	4	2	2	2	2	2	2	2
Bacteria	Proteobacteria	Betaproteobacteria	Burkholderiales	Comamonadaceae	Variovorax	paradoxus	2	2	2	5	2	2	2	2	2	2	2	2	2	2	2	2	2	2	2	2
