# Supplementary material for: Impact of 16S rRNA gene redundancy and primer pair selection on the quantification and classification of oral microbiota in next-generation sequencing
Source: Research Square preprint supplement (doi:10.21203/rs.3.rs-662236/v1), 2021-07-01
Supplement: Supplementary file 2 [file beaf30c9845c645d3d998ed4.xlsx]

## Sheet: Title.Abreviatures
Additional table 35. Overestimation factor based on matching amplicons of archaeal species using the archaeal-specific primer pairs
The overestimation factor (OF) of each species was divided by the number of gene copies, resulting in OF caused by the presence of matching amplicons (OF-MA). The calculation of this parameters is relative to the set of species used so comparisons between primer pairs with different species sets cannot be made
The species included in the table were those that presented at least one matching amplicon in any of the 39 primer pairs tested														The species included in the table were those that presented at least one matching amplicon in any of the 39 primer pairs tested		The species included in the table were those that presented at least one matching amplicon in any of the 39 primer pairs tested		The species included in the table were those that presented at least one matching amplicon in any of the 39 primer pairs tested		The species included in the table were those that presented at least one matching amplicon in any of the 39 primer pairs tested		The species included in the table were those that presented at least one matching amplicon in any of the 39 primer pairs tested		The species included in the table were those that presented at least one matching amplicon in any of the 39 primer pairs tested		The species included in the table were those that presented at least one matching amplicon in any of the 39 primer pairs tested		The species included in the table were those that presented at least one matching amplicon in any of the 39 primer pairs tested		The species included in the table were those that presented at least one matching amplicon in any of the 39 primer pairs tested		The species included in the table were those that presented at least one matching amplicon in any of the 39 primer pairs tested		The species included in the table were those that presented at least one matching amplicon in any of the 39 primer pairs tested		The species included in the table were those that presented at least one matching amplicon in any of the 39 primer pairs tested		The species included in the table were those that presented at least one matching amplicon in any of the 39 primer pairs tested		The species included in the table were those that presented at least one matching amplicon in any of the 39 primer pairs tested		The species included in the table were those that presented at least one matching amplicon in any of the 39 primer pairs tested		The species included in the table were those that presented at least one matching amplicon in any of the 39 primer pairs tested		The species included in the table were those that presented at least one matching amplicon in any of the 39 primer pairs tested		The species included in the table were those that presented at least one matching amplicon in any of the 39 primer pairs tested
ALC	Amplicon length category
bps	Base pairs
KP_F	Klindworth primer forward
KP_R	Klindworth primer reverse
L	Large amplicon length range, >600 base pairs
M	Medium amplicon length range, 301-600 base pairs
Max	Maximum
Min	Minimum
Num_genes	Number of genes
OF-MA	Overestimation factor with matching amplicons
OP_F	Oral primer forward
OP_R	Oral primer reverse
S	Short amplicon length range, 100-300 base pairs
[truncated: 2,500 more columns]

## Sheet: Additional_table_35
								Primer pairs previously selected due to their coverage									Most used primer pairs
						ALC		S		M				L			L
						Min mean value OF-MA	1.10819
						Max mean value OF-MA	1.98538
						Mean OF-MA	1	1.75731	1.98538	1.49415	1.45906	1.3538	1.14327	1.28363	1.10819	1.14327	1.14035
						Cumulative OF-MA	57	100.167	113.167	85.1667	83.1667	77.1667	65.1667	73.1667	63.1667	65.1667	65
Superkingdom	Phyla	Class	Order	Family	Genera	Species	Num_genes	KP_F018_KP_R002	OP_F066_KP_R013	KP_F018_KP_R032	KP_F018_OP_R073	KP_F020_KP_R013	KP_F022_KP_R063	OP_F114_KP_R013	KP_F018_KP_R063	OP_F066_OP_R016	KP_F014_KP_R011
Archaea	Crenarchaeota	Thermoprotei	Desulfurococcales	Desulfurococcaceae	Aeropyrum	camini	1	2	1	2	1	1	1	1	1	1	1
Archaea	Crenarchaeota	Thermoprotei	Desulfurococcales	Desulfurococcaceae	Aeropyrum	pernix	1	2	1	2	1	1	1	1	1	1	1
Archaea	Crenarchaeota	Thermoprotei	Desulfurococcales	Desulfurococcaceae	Desulfurococcus	amylolyticus	1	2	1	1	1	1	1	1	1	1	1
Archaea	Crenarchaeota	Thermoprotei	Desulfurococcales	Desulfurococcaceae	Desulfurococcus	mucosus	1	2	1	1	1	1	1	1	1	1	1
Archaea	Euryarchaeota	Halobacteria	Halobacteriales	Haloarculaceae	Haloarcula	hispanica	1	3	2	2	2	2	2	2	1	2	1
Archaea	Euryarchaeota	Halobacteria	Halobacteriales	Haloarculaceae	Haloarcula	marismortui	1	3	1	1	1	1	1	1	1	1	1
Archaea	Euryarchaeota	Halobacteria	Halobacteriales	Haloarculaceae	Haloarcula	sp. CBA1115	1	3	2	2	2	2	2	2	1	2	1
Archaea	Euryarchaeota	Halobacteria	Halobacteriales	Haloarculaceae	Halomicrobium	mukohataei	1	1.66667	1.66667	1.66667	1.66667	1.66667	1.66667	1.66667	1.66667	1.66667	1
Archaea	Euryarchaeota	Halobacteria	Halobacteriales	Haloarculaceae	Halomicrobium	sp. ZPS1	1	2.5	2.5	2.5	2.5	2.5	2.5	2.5	2.5	2.5	1
Archaea	Euryarchaeota	Halobacteria	Natrialbales	Natrialbaceae	Halopiger	xanaduensis	1	1	1	1	1	1	1	1	1	1	1
Archaea	Euryarchaeota	Halobacteria	Halobacteriales	Haloarculaceae	Halorhabdus	tiamatea	1	1	1	1	1	1	1	1	1	1	1
Archaea	Euryarchaeota	Halobacteria	Halobacteriales	Haloarculaceae	Halorhabdus	utahensis	1	1	1	1	1	1	1	1	1	1	1
Archaea	Euryarchaeota	Halobacteria	Natrialbales	Natrialbaceae	Halostagnicola	larsenii	1	1	1	1	1	1	1	1	1	1	1
Archaea	Euryarchaeota	Halobacteria	Natrialbales	Natrialbaceae	Haloterrigena	turkmenica	1	1	1	1	1	1	1	1	1	1	1
Archaea	Euryarchaeota	Methanococci	Methanococcales	Methanocaldococcaceae	Methanocaldococcus	bathoardescens	1	2	2	1	1	2	1	1	1	1	1
Archaea	Euryarchaeota	Methanococci	Methanococcales	Methanocaldococcaceae	Methanocaldococcus	fervens	1	1	2	1	1	2	1	1	1	1	1
Archaea	Euryarchaeota	Methanococci	Methanococcales	Methanocaldococcaceae	Methanocaldococcus	jannaschii	1	1	2	1	1	2	1	1	1	1	1
Archaea	Euryarchaeota	Methanococci	Methanococcales	Methanocaldococcaceae	Methanocaldococcus	sp. FS406-22	1	2	2	1	1	2	1	1	1	1	1
Archaea	Euryarchaeota	Methanococci	Methanococcales	Methanocaldococcaceae	Methanocaldococcus	vulcanius	1	1	1	1	1	1	1	1	1	1	1
Archaea	Euryarchaeota	Methanomicrobia	Methanosarcinales	Methanosarcinaceae	Methanococcoides	burtonii	1	1	1	1	1	1	1	1	1	1	1
Archaea	Euryarchaeota	Methanomicrobia	Methanosarcinales	Methanosarcinaceae	Methanococcoides	methylutens	1	1	1	1	1	1	1	1	1	1	1
Archaea	Euryarchaeota	Methanomicrobia	Methanosarcinales	Methanosarcinaceae	Methanosarcina	acetivorans	1	2	1	1	1	1	1	1	1	1	1
Archaea	Euryarchaeota	Methanomicrobia	Methanosarcinales	Methanosarcinaceae	Methanosarcina	barkeri	1	3	3	1	1	1	1	1	1	1	1
Archaea	Euryarchaeota	Methanomicrobia	Methanosarcinales	Methanosarcinaceae	Methanosarcina	horonobensis	1	2	4	2	2	2	1	2	1	1	1
Archaea	Euryarchaeota	Methanomicrobia	Methanosarcinales	Methanosarcinaceae	Methanosarcina	lacustris	1	1	4	1	1	1	1	1	1	1	1
Archaea	Euryarchaeota	Methanomicrobia	Methanosarcinales	Methanosarcinaceae	Methanosarcina	mazei	1	1	4	1	1	1	1	1	1	1	1
Archaea	Euryarchaeota	Methanomicrobia	Methanosarcinales	Methanosarcinaceae	Methanosarcina	siciliae	1	2	4	2	2	2	1	2	1	1	1
Archaea	Euryarchaeota	Methanomicrobia	Methanosarcinales	Methanosarcinaceae	Methanosarcina	sp. Kolksee	1	3	4	2	2	2	2	2	2	2	1
Archaea	Euryarchaeota	Methanomicrobia	Methanosarcinales	Methanosarcinaceae	Methanosarcina	sp. WH1	1	2	4	2	2	2	2	2	2	2	1
Archaea	Euryarchaeota	Methanomicrobia	Methanosarcinales	Methanosarcinaceae	Methanosarcina	sp. WWM596	1	2	4	2	2	2	2	2	2	2	1
Archaea	Euryarchaeota	Methanomicrobia	Methanosarcinales	Methanosarcinaceae	Methanosarcina	thermophila	1	1	3	1	1	1	1	1	1	1	1
Archaea	Euryarchaeota	Methanomicrobia	Methanosarcinales	Methanosarcinaceae	Methanosarcina	vacuolata	1	3	4	2	2	2	2	2	2	2	1
Archaea	Euryarchaeota	Halobacteria	Natrialbales	Natrialbaceae	Natrialba	magadii	1	1	1	1	1	1	1	1	1	1	1
Archaea	Euryarchaeota	Halobacteria	Natrialbales	Natrialbaceae	Natrinema	sp. J7-2	1	1	1	1	1	1	1	1	1	1	1
Archaea	Euryarchaeota	Halobacteria	Halobacteriales	Haloarculaceae	Natronomonas	moolapensis	1	1	2	1	1	1	1	1	1	1	1
Archaea	Euryarchaeota	Halobacteria	Halobacteriales	Haloarculaceae	Natronomonas	pharaonis	1	1	2	1	1	1	1	1	1	1	1
Archaea	Thaumarchaeota	Nitrososphaeria	Nitrososphaerales	Nitrososphaeraceae	Nitrososphaera	evergladensis (candidatus)	1	2	2	2	2	2	1	2	1	1	1
Archaea	Thaumarchaeota	Nitrososphaeria	Nitrososphaerales	Nitrososphaeraceae	Nitrososphaera	viennensis	1	2	2	2	2	2	1	2	1	1	1
Archaea	Crenarchaeota	Thermoprotei	Thermoproteales	Thermoproteaceae	Pyrobaculum	aerophilum	1	1	2	1	1	1	1	1	1	1	1
Archaea	Crenarchaeota	Thermoprotei	Thermoproteales	Thermoproteaceae	Pyrobaculum	arsenaticum	1	1	2	1	1	1	1	1	1	1	1
Archaea	Crenarchaeota	Thermoprotei	Thermoproteales	Thermoproteaceae	Pyrobaculum	ferrireducens	1	1	2	1	1	1	1	1	1	1	1
Archaea	Crenarchaeota	Thermoprotei	Thermoproteales	Thermoproteaceae	Pyrobaculum	oguniense	1	1	2	1	1	1	1	1	1	1	1
Archaea	Euryarchaeota	Thermococci	Thermococcales	Thermococcaceae	Pyrococcus	horikoshii	1	4	2	4	4	2	1	2	1	1	3
Archaea	Euryarchaeota	Thermococci	Thermococcales	Thermococcaceae	Pyrococcus	sp. NA2	1	4	1	4	4	1	1	1	1	1	3
Archaea	Euryarchaeota	Thermococci	Thermococcales	Thermococcaceae	Pyrococcus	sp. ST04	1	4	1	4	4	1	1	1	1	1	1
Archaea	Euryarchaeota	Thermococci	Thermococcales	Thermococcaceae	Pyrococcus	yayanosii	1	4	2	4	4	2	1	2	1	1	3
Archaea	Crenarchaeota	Thermoprotei	Desulfurococcales	Desulfurococcaceae	Staphylothermus	hellenicus	1	1	2	1	1	1	1	1	1	1	1
Archaea	Crenarchaeota	Thermoprotei	Desulfurococcales	Desulfurococcaceae	Staphylothermus	marinus	1	1	2	1	1	1	1	1	1	1	1
Archaea	Euryarchaeota	Thermococci	Thermococcales	Thermococcaceae	Thermococcus	barophilus	1	2	2	2	2	2	1	2	1	1	2
Archaea	Euryarchaeota	Thermococci	Thermococcales	Thermococcaceae	Thermococcus	cleftensis	1	1	3	1	1	1	1	1	1	1	1
Archaea	Euryarchaeota	Thermococci	Thermococcales	Thermococcaceae	Thermococcus	gammatolerans	1	1	1	1	1	1	1	1	1	1	1
Archaea	Euryarchaeota	Thermococci	Thermococcales	Thermococcaceae	Thermococcus	onnurineus	1	1	3	1	1	1	1	1	1	1	1
Archaea	Euryarchaeota	Thermococci	Thermococcales	Thermococcaceae	Thermococcus	paralvinellae	1	2	2	2	2	2	1	2	1	1	2
Archaea	Euryarchaeota	Thermococci	Thermococcales	Thermococcaceae	Thermococcus	sp. 4557	1	1	3	1	1	1	1	1	1	1	1
Archaea	Crenarchaeota	Thermoprotei	Desulfurococcales	Desulfurococcaceae	Thermogladius	calderae	1	1	1	1	1	1	1	1	1	1	1
Archaea	Crenarchaeota	Thermoprotei	Thermoproteales	Thermoproteaceae	Thermoproteus	tenax	1	2	1	1	1	1	1	1	1	1	1
Archaea	Crenarchaeota	Thermoprotei	Thermoproteales	Thermoproteaceae	Thermoproteus	uzoniensis	1	2	1	1	1	1	1	1	1	1	1
