# Supplementary material for: Impact of 16S rRNA gene redundancy and primer pair selection on the quantification and classification of oral microbiota in next-generation sequencing
Source: Research Square preprint supplement (doi:10.21203/rs.3.rs-662236/v1), 2021-07-01
Supplement: Supplementary file 3 [file ced0f14d0568ec60bb0ba3d8.xlsx]

## Sheet: Title.Abreviatures
Additional table 23. Bacterial species with matching amplicons using the bacterial-specific primer pairs
Matching amplicon identifiers are formed by a number and a letter. The number indicates the number of species with the same amplicon sequence, and the letter(s) indicates which species share such variant sequence. For example, with OP_F066-KP_R040, Agrobacterium fabrum and Agrobacterium radiobacter share the same amplicon sequence (2K= two species, one variant). If for a given primer all the lett…
ALC	Amplicon length category
bps	Base pairs
KP_F	Klindworth primer forward
KP_R	Klindworth primer reverse
L	Long amplicon length category, >600 bps
M	Medium amplicon length category, 301-600 bps
OP_F	Oral primer forward
OP_R	Oral primer reverse
S	Short amplicon length category, 100-300 bps
Yellow highlighted	Species from distinct genera that share the same 16S rRNA gene amplicon

## Sheet: Additional_table_23
							Primer pairs previously selected due to their coverage															Most used primer pairs
						ALC	S						M						L			M			L
Superkingdom	Phyla	Class	Order	Family	Genera	Species	KP_F048-OP_R043	OP_F098-OP_R119	OP_F066-KP_R040	OP_F009-OP_R030	KP_F061-KP_R074	OP_F101-OP_R030	OP_R053-KP_R020	KP_F048-KP_R031	KP_F048-OP_R073	KP_F051-KP_R041	KP_F051-OP_R030	OP_F116_KP_R060	KP_F048-OP_R030	KP_F048-KP_R060	KP_F056-KP_R077	KP_F031-KP_R021	KP_F047-KP_R035	OP_F009-OP_R029	KP_F034-KP_R065
Bacteria	Proteobacteria	Betaproteobacteria	Burkholderiales	Alcaligenaceae	Achromobacter	xylosoxidans			2R
Bacteria	Proteobacteria	Betaproteobacteria	Burkholderiales	Comamonadaceae	Acidovorax	ebreus			2V
Bacteria	Proteobacteria	Gammaproteobacteria	Pseudomonadales	Moraxellaceae	Acinetobacter	baumannii			3G	2I	2L	2M						2K						2E
Bacteria	Proteobacteria	Gammaproteobacteria	Pseudomonadales	Moraxellaceae	Acinetobacter	johnsonii			3G
Bacteria	Proteobacteria	Gammaproteobacteria	Pseudomonadales	Moraxellaceae	Acinetobacter	junii			3G	2I	2L	2M						2K						2E
Bacteria	Actinobacteria	Actinomycetia	Actinomycetales	Actinomycetaceae	Actinomyces	oris		3C	3I	2M	2R	2R				3B	2H	3B			2D			2K
Bacteria	Actinobacteria	Actinomycetia	Actinomycetales	Actinomycetaceae	Actinomyces	sp. oral taxon 169		3C	3I							3B		3B
Bacteria	Actinobacteria	Actinomycetia	Actinomycetales	Actinomycetaceae	Actinomyces	sp. oral taxon 171		3C	3I	2M	2R	2R				3B	2H	3B			2D			2K
Bacteria	Proteobacteria	Alphaproteobacteria	Hyphomicrobiales	Rhizobiaceae	Agrobacterium	fabrum			2K
Bacteria	Proteobacteria	Alphaproteobacteria	Hyphomicrobiales	Rhizobiaceae	Agrobacterium	radiobacter			2K
Bacteria	Firmicutes	Bacilli	Bacillales	Bacillaceae	Bacillus	subtilis			2P
Bacteria	Actinobacteria	Actinomycetia	Bifidobacteriales	Bifidobacteriaceae	Bifidobacterium	breve		2E		2G							2E							2G
Bacteria	Actinobacteria	Actinomycetia	Bifidobacteriales	Bifidobacteriaceae	Bifidobacterium	dentium
Bacteria	Actinobacteria	Actinomycetia	Bifidobacteriales	Bifidobacteriaceae	Bifidobacterium	longum		2E		2G							2E							2G
Bacteria	Proteobacteria	Betaproteobacteria	Burkholderiales	Alcaligenaceae	Bordetella	pertussis			2R
Bacteria	Proteobacteria	Betaproteobacteria	Burkholderiales	Burkholderiaceae	Burkholderia	cepacia			2U
Bacteria	Proteobacteria	Epsilonproteobacteria	Campylobacterales	Campylobacteraceae	Campylobacter	concisus				2J	2M
Bacteria	Proteobacteria	Epsilonproteobacteria	Campylobacterales	Campylobacteraceae	Campylobacter	curvus				2J	2M
Bacteria	Bacteroidetes	Flavobacteriia	Flavobacteriales	Flavobacteriaceae	Capnocytophaga	ochracea			2X
Bacteria	Bacteroidetes	Flavobacteriia	Flavobacteriales	Flavobacteriaceae	Capnocytophaga	sp. oral taxon 323			2X
Bacteria	Actinobacteria	Actinomycetia	Corynebacteriales	Corynebacteriaceae	Corynebacterium	kroppenstedtii			2W
Bacteria	Actinobacteria	Actinomycetia	Corynebacteriales	Corynebacteriaceae	Corynebacterium	simulans		2J	3H							2F
Bacteria	Actinobacteria	Actinomycetia	Corynebacteriales	Corynebacteriaceae	Corynebacterium	singulare			3H
Bacteria	Actinobacteria	Actinomycetia	Corynebacteriales	Corynebacteriaceae	Corynebacterium	sp. ATCC 6931			2W
Bacteria	Actinobacteria	Actinomycetia	Corynebacteriales	Corynebacteriaceae	Corynebacterium	striatum		2J	3H							2F
Bacteria	Proteobacteria	Gammaproteobacteria	Enterobacterales	Enterobacteriaceae	Cronobacter	malonaticus	2G | 2L	2H | 2K	4B	2K	2N	2N	2D	2C | 2F	2A | 2D	2D | 2H	2F | 2J	2M	2A | 2D	2A	2B | 2F		2C | 2F	2F
Bacteria	Proteobacteria	Gammaproteobacteria	Enterobacterales	Enterobacteriaceae	Cronobacter	sakazakii	2G | 2L	2H | 2K	4B	2K	2N	2N	2D	2C | 2F	2A | 2D	2D | 2H	2F | 2J	2M	2A | 2D	2A	2B | 2F		2C | 2F	2F
Bacteria	Actinobacteria	Actinomycetia	Propionibacteriales	Propionibacteriaceae	Cutibacterium	acnes			2M
Bacteria	Proteobacteria	Gammaproteobacteria	Enterobacterales	Enterobacteriaceae	Escherichia	coli			4B		3B	3B
Bacteria	Fusobacteria	Fusobacteriia	Fusobacteriales	Fusobacteriaceae	Fusobacterium	hwasookii	2J | 2M		2L	2B	2F	2F						2O						2J
Bacteria	Fusobacteria	Fusobacteriia	Fusobacteriales	Fusobacteriaceae	Fusobacterium	nucleatum	2J | 2M		2L	2B	2F	2F						2O						2J
Bacteria	Proteobacteria	Gammaproteobacteria	Pasteurellales	Pasteurellaceae	Haemophilus	influenzae		2G
Bacteria	Proteobacteria	Gammaproteobacteria	Pasteurellales	Pasteurellaceae	Haemophilus	parainfluenzae					2Q	2Q
Bacteria	Proteobacteria	Gammaproteobacteria	Pasteurellales	Pasteurellaceae	Haemophilus	sp. oral taxon 036		2G
Bacteria	Proteobacteria	Gammaproteobacteria	Enterobacterales	Enterobacteriaceae	Klebsiella	aerogenes		3B	4B		2O	2O
Bacteria	Proteobacteria	Gammaproteobacteria	Enterobacterales	Enterobacteriaceae	Klebsiella	pneumoniae	2D | 2K	3B			3B | 2S	3B | 2S	2A | 2B	2B | 2E				2G | 2P					2B | 2E
Bacteria	Proteobacteria	Gammaproteobacteria	Enterobacterales	Enterobacteriaceae	Klebsiella	variicola	2D | 2K	3B	2T		3B | 2S	3B | 2S	2A | 2B	2B | 2E				2G | 2P					2B | 2E
Bacteria	Actinobacteria	Actinomycetia	Micrococcales	Micrococcaceae	Kocuria	palustris
Bacteria	Firmicutes	Bacilli	Lactobacillales	Lactobacillaceae	Lacticaseibacillus	paracasei	2F		2S	2H	2K	2L						2J						2D
Bacteria	Firmicutes	Bacilli	Lactobacillales	Lactobacillaceae	Lacticaseibacillus	rhamnosus	2F		2S	2H	2K	2L						2J						2D
Bacteria	Firmicutes	Bacilli	Lactobacillales	Lactobacillaceae	Lactobacillus	acidophilus			4C
Bacteria	Firmicutes	Bacilli	Lactobacillales	Lactobacillaceae	Lactobacillus	amylovorus			4C
Bacteria	Firmicutes	Bacilli	Lactobacillales	Lactobacillaceae	Lactobacillus	gasseri		2F	4C	2D	2H	2H				2C	2C							2B
Bacteria	Firmicutes	Bacilli	Lactobacillales	Lactobacillaceae	Lactobacillus	johnsonii		2F	4C	2D	2H	2H				2C	2C							2B
Bacteria	Firmicutes	Bacilli	Lactobacillales	Lactobacillaceae	Lentilactobacillus	buchneri			2Q
Bacteria	Fusobacteria	Fusobacteriia	Fusobacteriales	Leptotrichiaceae	Leptotrichia	buccalis			2Y
Bacteria	Fusobacteria	Fusobacteriia	Fusobacteriales	Leptotrichiaceae	Leptotrichia	sp. oral taxon 498			2Y
Bacteria	Firmicutes	Bacilli	Lactobacillales	Lactobacillaceae	Levilactobacillus	brevis			2Q
Bacteria	Firmicutes	Bacilli	Lactobacillales	Lactobacillaceae	Limosilactobacillus	fermentum			2O
Bacteria	Firmicutes	Bacilli	Lactobacillales	Lactobacillaceae	Limosilactobacillus	reuteri			2O
Bacteria	Firmicutes	Bacilli	Bacillales	Listeriaceae	Listeria	monocytogenes			9A
Bacteria	Actinobacteria	Actinomycetia	Corynebacteriales	Mycobacteriaceae	Mycobacterium	leprae			3D
Bacteria	Actinobacteria	Actinomycetia	Corynebacteriales	Mycobacteriaceae	Mycobacterium	tuberculosis			3D
Bacteria	Actinobacteria	Actinomycetia	Corynebacteriales	Mycobacteriaceae	Mycolicibacterium	neoaurum			3D
Bacteria	Tenericutes	Mollicutes	Mycoplasmatales	Mycoplasmataceae	Mycoplasma	genitalium						2K
Bacteria	Tenericutes	Mollicutes	Mycoplasmatales	Mycoplasmataceae	Mycoplasma	pneumoniae						2K
Bacteria	Proteobacteria	Betaproteobacteria	Neisseriales	Neisseriaceae	Neisseria	gonorrhoeae			2J
Bacteria	Proteobacteria	Betaproteobacteria	Neisseriales	Neisseriaceae	Neisseria	meningitidis			2J
Bacteria	Actinobacteria	Actinomycetia	Propionibacteriales	Propionibacteriaceae	Propionibacterium	sp. oral taxon 193			2M
Bacteria	Proteobacteria	Gammaproteobacteria	Pseudomonadales	Pseudomonadaceae	Pseudomonas	aeruginosa	2B
Bacteria	Proteobacteria	Gammaproteobacteria	Pseudomonadales	Pseudomonadaceae	Pseudomonas	fluorescens	2C		2N	2F	2J	2J						2I
Bacteria	Proteobacteria	Gammaproteobacteria	Pseudomonadales	Pseudomonadaceae	Pseudomonas	protegens	2C		2N	2F	2J	2J						2I
Bacteria	Proteobacteria	Gammaproteobacteria	Pseudomonadales	Pseudomonadaceae	Pseudomonas	stutzeri	2B
Bacteria	Proteobacteria	Betaproteobacteria	Burkholderiales	Burkholderiaceae	Ralstonia	pickettii			2U
Bacteria	Actinobacteria	Actinomycetia	Micrococcales	Micrococcaceae	Rothia	dentocariosa
Bacteria	Actinobacteria	Actinomycetia	Micrococcales	Micrococcaceae	Rothia	mucilaginosa
Bacteria	Actinobacteria	Actinomycetia	Actinomycetales	Actinomycetaceae	Schaalia	meyeri			2CC
Bacteria	Actinobacteria	Actinomycetia	Actinomycetales	Actinomycetaceae	Schaalia	odontolytica			2CC
Bacteria	Firmicutes	Negativicutes	Selenomonadales	Selenomonadaceae	Selenomonas	sp. oral taxon 478			2BB
Bacteria	Firmicutes	Negativicutes	Selenomonadales	Selenomonadaceae	Selenomonas	sp. oral taxon 920			2BB
Bacteria	Proteobacteria	Gammaproteobacteria	Enterobacterales	Yersiniaceae	Serratia	marcescens			2T		2O | 2Q	2O | 2Q
Bacteria	Firmicutes	Bacilli	Bacillales	Staphylococcaceae	Staphylococcus	aureus		7A	9A	2E	2I	2I				7A	2D	2E | 2F			2A			2C
Bacteria	Firmicutes	Bacilli	Bacillales	Staphylococcaceae	Staphylococcus	capitis		7A	9A	2C	2G	2G				7A	2B	2F						2A
Bacteria	Firmicutes	Bacilli	Bacillales	Staphylococcaceae	Staphylococcus	epidermidis		7A	9A	2C	2G	2G				7A	2B							2A
Bacteria	Firmicutes	Bacilli	Bacillales	Staphylococcaceae	Staphylococcus	haemolyticus		7A	9A	2E	2I	2I				7A	2D	2E			2A			2C
Bacteria	Firmicutes	Bacilli	Bacillales	Staphylococcaceae	Staphylococcus	lugdunensis		7A	9A	3A	3C	3C				7A	3A
Bacteria	Firmicutes	Bacilli	Bacillales	Staphylococcaceae	Staphylococcus	pasteuri	2I	7A	9A	3A	3C	3C	2C	2D	2B	7A	3A	2N	2B	2B	2C	2A	2D	2I	2A
Bacteria	Firmicutes	Bacilli	Bacillales	Staphylococcaceae	Staphylococcus	pettenkoferi			9A
Bacteria	Firmicutes	Bacilli	Bacillales	Staphylococcaceae	Staphylococcus	schleiferi			2P
Bacteria	Firmicutes	Bacilli	Bacillales	Staphylococcaceae	Staphylococcus	warneri	2I	7A	9A	3A	3C	3C	2C	2D	2B	7A	3A	2N	2B	2B	2C	2A	2D	2I	2A
Bacteria	Firmicutes	Bacilli	Lactobacillales	Streptococcaceae	Streptococcus	agalactiae			3E									2C
Bacteria	Firmicutes	Bacilli	Lactobacillales	Streptococcaceae	Streptococcus	anginosus	2E		3F
Bacteria	Firmicutes	Bacilli	Lactobacillales	Streptococcaceae	Streptococcus	constellatus			3F									2H
Bacteria	Firmicutes	Bacilli	Lactobacillales	Streptococcaceae	Streptococcus	cristatus	2H											2L
Bacteria	Firmicutes	Bacilli	Lactobacillales	Streptococcaceae	Streptococcus	gordonii			3E		2D	2D						2L
Bacteria	Firmicutes	Bacilli	Lactobacillales	Streptococcaceae	Streptococcus	intermedius	2E		3F									2H
Bacteria	Firmicutes	Bacilli	Lactobacillales	Streptococcaceae	Streptococcus	mitis	4A	3D	2DD	2N	5A	5A		3A	2C	2G	2I	3A	2C	2C	2E		3A	2L
Bacteria	Firmicutes	Bacilli	Lactobacillales	Streptococcaceae	Streptococcus	oralis	4A	3D	2DD	2N	5A	5A		3A	2C	2G	2I	3A	2C	2C	2E		3A	2L
Bacteria	Firmicutes	Bacilli	Lactobacillales	Streptococcaceae	Streptococcus	parasanguinis	2H				2E	2E
Bacteria	Firmicutes	Bacilli	Lactobacillales	Streptococcaceae	Streptococcus	pneumoniae	4A				2E /5A	2E /5A						3A
Bacteria	Firmicutes	Bacilli	Lactobacillales	Streptococcaceae	Streptococcus	pyogenes					2D	2D						2C
Bacteria	Firmicutes	Bacilli	Lactobacillales	Streptococcaceae	Streptococcus	salivarius		2I	2Z	2L	2P	2P				2E	2G							2H
Bacteria	Firmicutes	Bacilli	Lactobacillales	Streptococcaceae	Streptococcus	sanguinis			3E		5A	5A
Bacteria	Firmicutes	Bacilli	Lactobacillales	Streptococcaceae	Streptococcus	sp. oral taxon 431	4A	3D			5A	5A		3A									3A
Bacteria	Firmicutes	Bacilli	Lactobacillales	Streptococcaceae	Streptococcus	thermophilus		2I	2Z	2L	2P	2P				2E	2G							2H
Bacteria	Bacteroidetes	Bacteroidia	Bacteroidales	Tannerellaceae	Tannerella	forsythia			2AA
Bacteria	Bacteroidetes	Bacteroidia	Bacteroidales	Tannerellaceae	Tannerella	sp. oral taxon HOT-286			2AA
Bacteria	Spirochaetes	Spirochaetia	Spirochaetales	Spirochaetaceae	Treponema	denticola												2D
Bacteria	Spirochaetes	Spirochaetia	Spirochaetales	Spirochaetaceae	Treponema	putidum												2D
Bacteria	Proteobacteria	Betaproteobacteria	Burkholderiales	Comamonadaceae	Variovorax	paradoxus			2V
