# Supplementary material for: Impact of 16S rRNA gene redundancy and primer pair selection on the quantification and classification of oral microbiota in next-generation sequencing
Source: Research Square preprint supplement (doi:10.21203/rs.3.rs-662236/v1), 2021-07-01
Supplement: Supplementary file 4 [file e3ed6754eb05848c86327333.xlsx]

## Sheet: Titles.Abreviatures
Additional table 26. Species with and without matching amplicons and coverage estimators for all primer pairs targeting bacteria
Additional table 27. Species with and without matching amplicons and coverage estimators for all primer pairs targeting archaea
Additional table 28. Species with and without matching amplicons and coverage estimators for the bacteria and archaea primer pairs
A	Archaea
ALC	Amplicon length category
B	Bacteria
bps	Base pairs
Diff	Difference
KP_F	Klindworth primer forward
KP_R	Klindworth primer reverse
L	Large amplicon length category, >600 bps
M	Medium amplicon length category, 301-600 bps
MA	Matching amplicons
NMA	No matching amplicons
OP_F	Oral primer forward
OP_R	Oral primer reverse
S	Short amplicon length category, 100-300 bps
SC	Species coverage
SC-NMA	Species coverage with no matching amplicons

## Sheet: Additional_table_26
Primer pair	ALC	Primer target	Total species	Detected species	Non detected species	Detected species (SC)(%)	Species with MA	Species with MA (%)	Species with NMA	SC-NMA (%)	Diff SC - SC-NMA	Mean diff SC - SC-NMA
KP_F048_OP_R043	S	B	186	180	6	96.77	22	12.222	158	84.946	11.824	21.3419
OP_F098_OP_R119	S	B	186	177	9	95.16	28	15.819	149	80.108	15.052	21.3419
OP_F066_KP_R040	S	B	186	165	21	88.71	77	46.667	88	47.312	41.398	21.3419
OP_F009_OP_R030	S	B	186	181	5	97.31	29	16.022	152	81.72	15.59	21.3419
KP_F061_KP_R074	S	B	186	169	17	90.86	39	23.077	130	69.892	20.968	21.3419
OP_F101_OP_R030	S	B	186	167	19	89.78	39	23.353	128	68.817	20.963	21.3419
OP_F114_KP_R002	S	B+A	186	172	14	92.47	22	12.791	150	80.645	11.825	21.3419
KP_F020_KP_R032	S	B+A	186	176	10	94.62	28	15.909	148	79.57	15.05	21.3419
OP_F066_OP_R073	S	B+A	186	182	4	97.85	85	46.703	97	52.151	45.699	21.3419
KP_F078_OP_R010	S	B+A	186	176	10	94.62	28	15.909	148	79.57	15.05	21.3419
OP_R053_KP_R020	M	B	186	179	7	96.24	6	3.352	173	93.011	3.229	7.3013
KP_F048_KP_R031	M	B	186	180	6	96.77	9	5	171	91.935	4.835	7.3013
KP_F048_OP_R073	M	B	186	178	8	95.7	6	3.371	172	92.473	3.227	7.3013
KP_F051_KP_R041	M	B	186	166	20	89.25	20	12.048	146	78.495	10.755	7.3013
KP_F051_OP_R030	M	B	186	184	2	98.92	19	10.326	165	88.71	10.21	7.3013
OP_F116_KP_R060	M	B	186	185	1	99.46	31	16.757	154	82.796	16.664	7.3013
KP_F031_KP_R021	M	B	186	138	48	74.19	2	1.449	136	73.118	1.072	7.3013
KP_F047_KP_R035	M	B	186	177	9	95.16	9	5.085	168	90.323	4.837	7.3013
OP_F009_OP_R029	M	B	186	164	22	88.17	24	14.634	140	75.269	12.901	7.3013
OP_F114_KP_R031	M	B+A	186	180	6	96.77	9	5	171	91.935	4.835	7.3013
OP_F114_OP_R073	M	B+A	186	178	8	95.7	6	3.371	172	92.473	3.227	7.3013
KP_F020_OP_R073	M	B+A	186	176	10	94.62	22	12.5	154	82.796	11.824	7.3013
KP_F048_OP_R030	L	B	186	180	6	96.77	6	3.333	174	93.548	3.222	4.2979
KP_F048_KP_R060	L	B	186	180	6	96.77	6	3.333	174	93.548	3.222	4.2979
KP_F056_KP_R077	L	B	186	180	6	96.77	10	5.556	170	91.398	5.372	4.2979
KP_F034_KP_R065	L	B	186	155	31	83.33	2	1.29	153	82.258	1.072	4.2979
OP_F114_OP_R121	L	B+A	186	180	6	96.77	6	3.333	174	93.548	3.222	4.2979
KP_F020_OP_R121	L	B+A	186	177	9	95.16	10	5.65	167	89.785	5.375	4.2979
OP_F066_OP_R121	L	B+A	186	185	1	99.46	16	8.649	169	90.86	8.6	4.2979

## Sheet: Additional_table_27
Primer pair	ALC	Primer target	Total species	Detected species	Non detected species	Detected species (SC)(%)	Species with MA	Species with MA (%)	Species with NMA	SC-NMA (%)	Diff SC - SC-NMA	Mean diff SC - SC-NMA
KP_F018_KP_R002	S	A	135	129	6	95.56	29	22.481	100	74.074	21.486	23.7042
OP_F066_KP_R013	S	A	135	129	6	95.56	35	27.132	94	69.63	25.93	23.7042
OP_F114_KP_R002	S	B+A	135	134	1	99.26	29	21.642	105	77.778	21.482	23.7042
KP_F020_KP_R032	S	B+A	135	134	1	99.26	30	22.388	104	77.037	22.223	23.7042
OP_F066_OP_R073	S	B+A	135	126	9	93.33	49	38.889	77	57.037	36.293	23.7042
KP_F078_OP_R010	S	B+A	135	86	49	63.7	20	23.256	66	48.889	14.811	23.7042
KP_F018_KP_R032	M	A	135	130	5	96.3	20	15.385	110	81.481	14.819	13.7556
KP_F018_OP_R073	M	A	135	122	13	90.37	18	14.754	104	77.037	13.333	13.7556
KP_F020_KP_R013	M	A	135	128	7	94.81	20	15.625	108	80	14.81	13.7556
KP_F022_KP_R063	M	A	135	124	11	91.85	8	6.452	116	85.926	5.924	13.7556
OP_F114_KP_R031	M	B+A	135	134	1	99.26	20	14.925	114	84.444	14.816	13.7556
OP_F114_OP_R073	M	B+A	135	126	9	93.33	18	14.286	108	80	13.33	13.7556
KP_F020_OP_R073	M	B+A	135	125	10	92.59	26	20.8	99	73.333	19.257	13.7556
OP_F114_KP_R013	L	A	135	129	6	95.56	16	12.403	113	83.704	11.856	5.8216
KP_F018_KP_R063	L	A	135	127	8	94.07	6	4.724	121	89.63	4.44	5.8216
OP_F066_OP_R016	L	A	135	124	11	91.85	8	6.452	116	85.926	5.924	5.8216
KP_F014_KP_R011	L	A	135	41	94	30.37	5	12.195	36	26.667	3.703	5.8216
OP_F114_OP_R121	L	B+A	135	129	6	95.56	6	4.651	123	91.111	4.449	5.8216
KP_F020_OP_R121	L	B+A	135	129	6	95.56	6	4.651	123	91.111	4.449	5.8216
OP_F066_OP_R121	L	B+A	135	130	5	96.3	8	6.154	122	90.37	5.93	5.8216

## Sheet: Additional_table_28
Primer pair	ALC	Primer target	Total species	Detected species	Non detected species	Detected species (SC)(%)	Species with MA	Species with MA (%)	Species with NMA	SC-NMA (%)
OP_F114-KP_R002	S	B+A	321	306	15	95.33	51	16.667	255	79.439
KP_F020-KP_R032	S	B+A	321	310	11	96.57	58	18.71	252	78.505
OP_F066-OP_R073	S	B+A	321	308	13	95.95	134	43.506	174	54.206
KP_F078-OP_R010	S	B+A	321	262	59	81.62	48	18.321	214	66.667
OP_F114-KP_R031	M	B+A	321	314	7	97.82	29	9.236	285	88.785
OP_F114-OP_R073	M	B+A	321	304	17	94.7	24	7.895	280	87.227
KP_F020-OP_R073	M	B+A	321	301	20	93.77	48	15.947	253	78.816
OP_F114-OP_R121	L	B+A	321	309	12	96.26	12	3.883	297	92.523
KP_F020-OP_R121	L	B+A	321	306	15	95.33	16	5.229	290	90.343
OP_F066-OP_R121	L	B+A	321	315	6	98.13	24	7.619	291	90.654
